# Supplementary material for: A pH-sensitive polymer based precise tumor targeting strategy with reduced uptake of nanoparticles by non-cancerous cells
Source: Royal Society of Chemistry journal article supplement (doi:10.1039/c9tb01202h), 2019-01-01
Supplement: c9tb01202h1.pdf [file c9tb01202h1.pdf]

**1 A pH-sensitive polymer based tumor precise targeting strategy with reduced uptake of**  
**2 nanoparticles by non-cancerous cells**

3  
4 Zihou Li<sup>a,b,c,d</sup>, Xuehua Ma<sup>a</sup>, Yuanzhi Xia<sup>a</sup>, Kun Qian<sup>a,d</sup>, Ozioma Udochukwu Akakuru<sup>a</sup>, Lijia  
5 Luo<sup>a,d</sup>, Jianjun Zheng<sup>e</sup>, Ping Cui<sup>a</sup>, Zheyu Shen<sup>a,\*</sup>, Aiguo Wu<sup>a,\*</sup>

6  
7 <sup>a</sup> Cixi Institute of Biomedical Engineering, CAS Key Laboratory of Magnetic Materials and  
8 Devices, & Key Laboratory of Additive Manufacturing Materials of Zhejiang Province, Ningbo  
9 Institute of Materials Technology and Engineering, Chinese Academy of Sciences, Ning-bo,  
10 Zhe-jiang 315201, China.

11 <sup>b</sup> School of Physical Science and Technology, ShanghaiTech University, Shanghai 200031,  
12 China.

13 <sup>c</sup> Shanghai Institute of Ceramics, Chinese Academy of Sciences, Shanghai 200050, China.

14 <sup>d</sup> Institute of Physics, University of Chinese Academy of Sciences, Beijing 100190, China.

15 <sup>e</sup> HuaMei Hospital, University of Chinese Academy of Sciences, 41 Northwest Street, Ning-bo,  
16 Zhe-jiang, 315010, China.

17

18 Corresponding Authors

19 \*E-mail: shenzheyu@nimte.ac.cn; Tel: +86 574 87617278

20 \*E-mail: aiguo@nimte.ac.cn; Tel: +86 574 86685163

## 22 **Materials and Methods**

### 23 **Materials**

24  $\text{FeCl}_3 \cdot 6\text{H}_2\text{O}$  (99%),  $\text{FeCl}_2 \cdot 4\text{H}_2\text{O}$  (99%), NaOH (99.99%), diethylene glycol (DEG, 99%),  
25 glutaraldehyde (50 wt%), methoxypolyethylene glycol amine (mPEG, Mw = 2, 5, and 10 kDa),  
26 2,3-dimethylmaleic anhydride (DCA) and dimethyl sulfoxide (DMSO) were purchased from  
27 Aladdin Industrial Inc. (Shanghai, China). Bovine Serum Albumin (BSA) was purchased from  
28 Sigma (USA). Folic acid (FA), 1-ethyl-3-(3-dimethylaminopropyl) carbodiimide hydrochloride  
29 (EDC.HCl), N-hydroxysuccinimide (NHS), L-lysine (Lys) were purchased from Sinopharm  
30 Chemical Reagent Co., Ltd (Shanghai, China).

31

### 32 **Cell culture**

33 Human breast cancer cell line (MCF-7) was cultured in the dulbecco's modified eafle's medium  
34 (DMEM) supplemented with 10 wt% of fetal bovine serum (FBS), 100 units/mL of penicillin  
35 and 100 mg/mL of streptomycin.

36

### 37 **Cellular uptake of the nanoparticles**

38 The cellular uptake of SPION-AN-FA@mPEG4 pretreated in pH 7.4 or 5.5 of PBS by MCF-7  
39 cells was tested using a laser scanning confocal microscope (LSCM). Typically, 2.0 mL  $4 \times 10^4$   
40 cells  $\text{mL}^{-1}$  of the MCF-7 cells were seeded into a glass bottom cell culture dish and allowed to  
41 adhere at 37 °C under 5 %  $\text{CO}_2$  atmosphere overnight, respectively. Then DMEM medium was  
42 replaced with fresh one containing SPION-AN-FA@mPEG4 (0.25 mg/mL), which were pre-  
43 incubated in pH 7.4 or 5.5 of PBS for 12 h. After 2.0 h incubation, the cells were washed thrice  
44 with PBS, fixed with 4 % formaldehyde for 30 min, permeabilized with 0.1 % triton for 5.0 min,

45 blocked with 1.0 % BSA for 30 min and then stained with Hoechst (5.0  $\mu\text{g/mL}$ ) for 30 min at  
46 room temperature. Finally, the sample were simultaneously excited at 405 and 488 nm and the  
47 fluorescence images at emission wavelengths of 420-480 and 510-540 nm were observed using a  
48 LSCM (TCS SP5 II, Leica, Germany).

49

## 50 **Flow cytometry analysis**

51 We investigated the cellular uptake of SPION-AN-FA@mPEG1-6 nanoparticles by MCF-7  
52 cells. In a typical experiment, 2.0 mL  $5 \times 10^4$  cells/mL MCF-7 cells were seeded into a 6-well  
53 plate. After 48 h of incubation at 37°C, the growth medium was replaced with 2.0 mL of fresh  
54 one (without FBS) containing SPION-AN-FA@mPEG1-6 (0.25 mg/mL), which were pre-  
55 incubated in pH 7.4, 6.5 or 5.5 of PBS for 12 h. After 2.0 h incubation, the cells were washed  
56 thrice with PBS to remove the extracellular nanoparticles. The cells were then treated with  
57 trypsin for 3.0 min, centrifuged ( $500 \times g$ , 5 min), and then subjected to flow cytometry analysis  
58 on a BD LSRfortessa instrument (BD biosciences COE, Shanghai, China).

59

## 60 **Cytotoxicity of the nanoparticles**

61 To evaluate the cytotoxicity of the SPION-AN-FA@mPEG, experiments were carried out with  
62 MCF-7 cells by MTT assay. Typically, 100  $\mu\text{L}$   $1 \times 10^5$  cells/mL were seeded into 96-well plate  
63 and allowed to adhere overnight. After 24 h, the medium was replaced with 100  $\mu\text{L}$  of fresh one  
64 containing various concentrations of the nanoparticles ( $C_{\text{Fe}}$  0~1 mM). After 48 h, 10  $\mu\text{L}$  of MTT  
65 (5.0 mg/mL in PBS) was added into each well for another 4 h incubation. Then the growth  
66 medium was replaced with 100  $\mu\text{L}$  of DMSO to dissolve the fromazan crystal. Finally, the  
67 absorbance was measured at a wavelength of 550 nm by an automated plate reader (iMark 168-

68 1130, Bio-rad, USA) to calculate the cell viability.

69

## 70 **Tumor model**

71 All animal experiments were approved by the animal care and use committee of the Ningbo  
72 University, China. Female BALB/c mice (4 weeks) were purchased from the Card Vince  
73 Laboratory Animal Co. Limited (Changzhou, China). MCF-7 cells were inoculated by  
74 subcutaneous injection to obtain tumor-bearing mice.

75

## 76 **MRI studies *in vivo***

77  $T_2$ -weighted MRI of tumor-bearing mice pre- and post-injection of SPION, SPION-AN-FA and  
78 SPION-AN-FA@mPEG nanoparticles were conducted on a MRI instrument (MesoMR23-060H-  
79 1, TR = 1600 ms, TE = 40 ms). The nanoparticles (30 mg/kg) was injected *via* tail vein on the  
80 MCF-7 tumor bearing nude mice. The  $T_2$  images were observed at 0, 1, 4, 12, 24, and 48 h post-  
81 injection.

82

## 83 **Histopathology assessment of healthy mice treated with SPION-AN-FA@mPEG**

84 *In vivo* toxicity of SPION-AN-FA@mPEG nanoparticles was evaluated on healthy mice.  
85 Typically, the mice were intravenously injected with PBS (control) or SPION-AN-FA@mPEG  
86 (30 mg/kg). The mice were sacrificed at 7 days post-injection. The main organs, including heart,  
87 liver, spleen, lung, and kidney, were preserved in aqueous buffered zinc formalin fixative (Z-  
88 FIX) and stained with hematoxylin and eosin for histological analysis.

90 **Table S1.** Synthesis of the SPION-AN-FA@mPEG nanoparticles

| nanoparticles         | Molecular weight of<br>mPEG (kDa) | [mPEG]/[SPION-AN-FA]<br>(mass ratio) <sup>a</sup> |
|-----------------------|-----------------------------------|---------------------------------------------------|
| SPION-AN-<br>FA@mPEG1 | 2                                 | 2                                                 |
| SPION-AN-<br>FA@mPEG2 | 5                                 | 2                                                 |
| SPION-AN-<br>FA@mPEG3 | 10                                | 2                                                 |
| SPION-AN-<br>FA@mPEG4 | 10                                | 0.5                                               |
| SPION-AN-<br>FA@mPEG5 | 10                                | 1                                                 |
| SPION-AN-<br>FA@mPEG6 | 10                                | 2                                                 |

91 <sup>a</sup> Mass ratio of total polymers of mPEG to nanoparticles of SPION-AN-FA

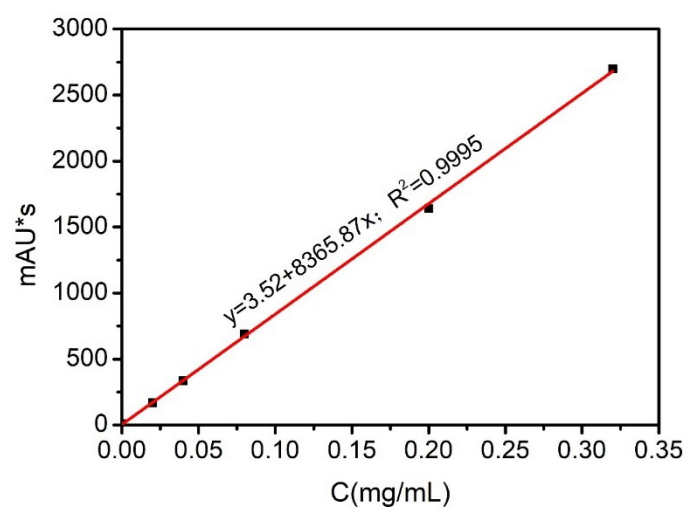

93

94 **Figure S1.** Standard curve of DCA measured by HPLC.

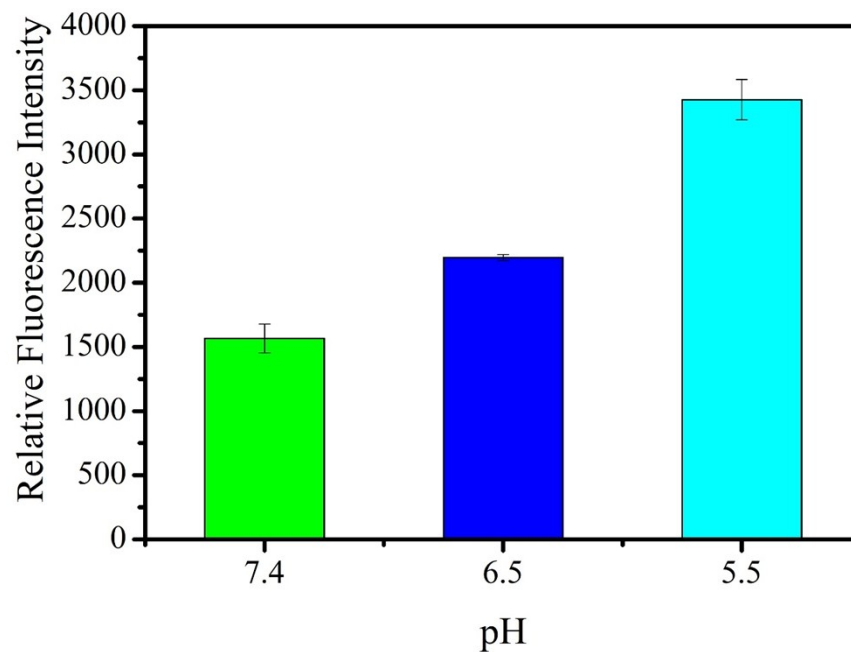

96

97 **Figure S2.** The ratio of relative fluorescence intensity of MCF-7 cells treated with SPION-AN-  
 98 FA@mPEG4 nanoparticles, which were pretreated in pH 7.4, 6.5 and 5.5 of PBS for 12 h, to  
 99 untreated cells (*i.e.*, relative fluorescence intensity).

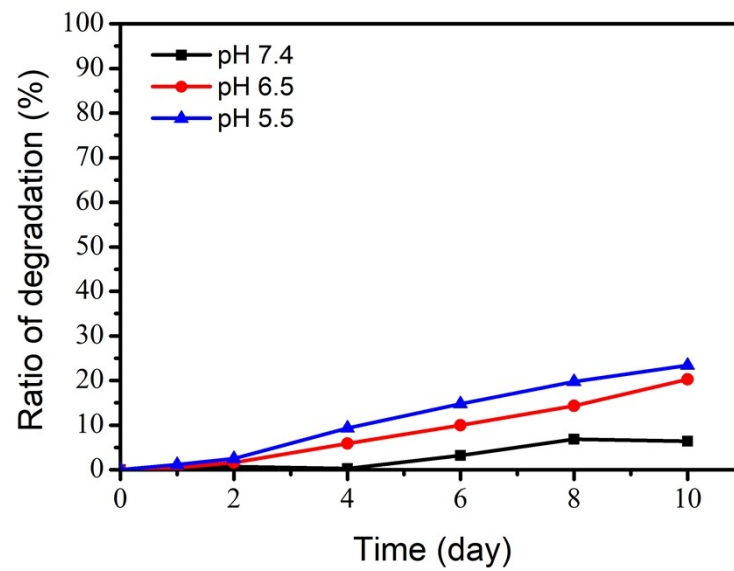

101

102 **Figure S3.** The degradation of albumin nanoparticles in different pH conditions.

103



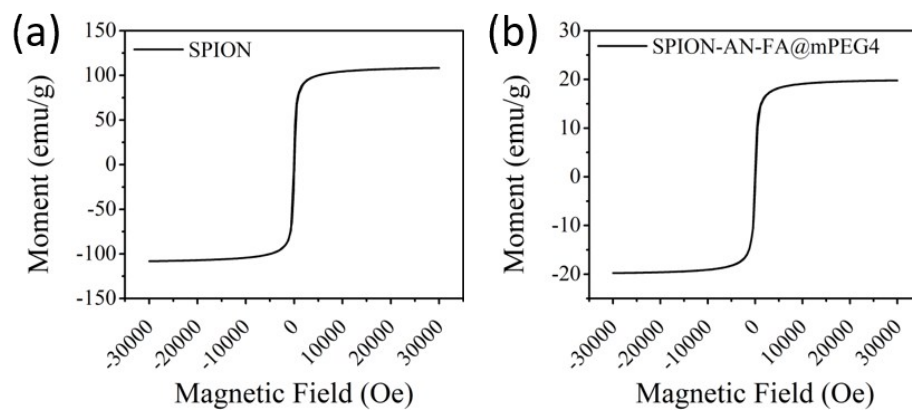

105

106 **Figure S4.** M-H curves of SPION (a), or SPION-AN-FA@mPEG4 nanoparticles (b).

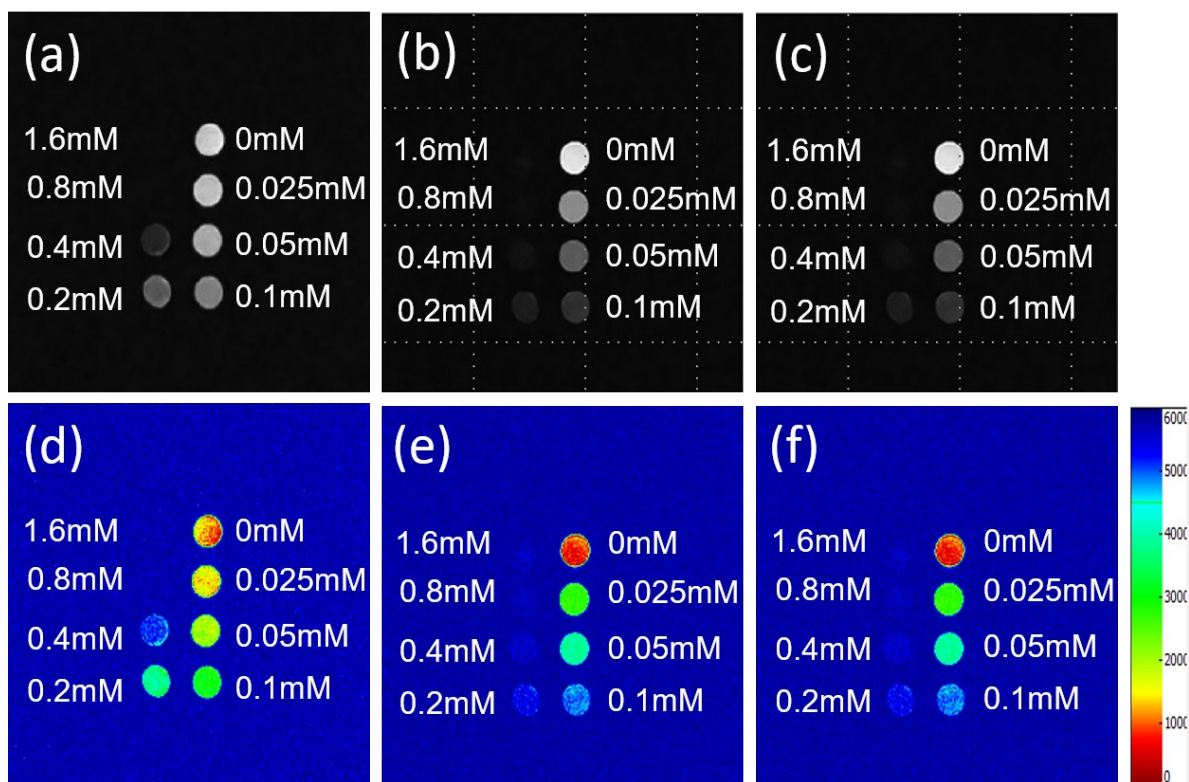

110 **Figure S5.**  $T_2$ -weighted MR images of (a) SPION, (b) SPION-AN-FA and (c) SPION-AN-  
 111 FA@mPEG4 at different Fe concentrations. (d-f) are the corresponding pseudo color pictures of  
 112 (a-c).

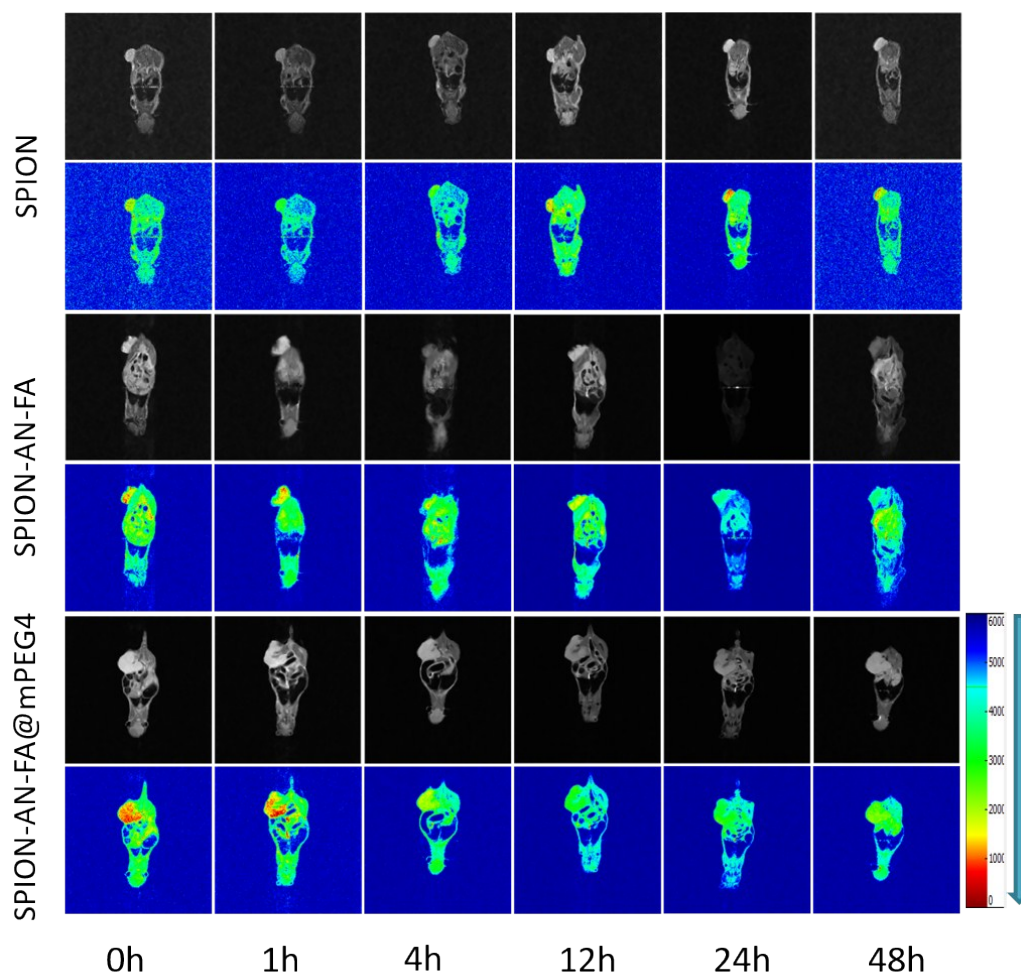

114

115 **Figure S6.**  $T_2$ -weighted MR images of tumor-bearing mice pre- or post-injection of SPION,  
 116 SPION-AN-FA, or SPION-AN-FA@mPEG4 nanoparticles (TR = 1600 ms, TE = 40 ms).

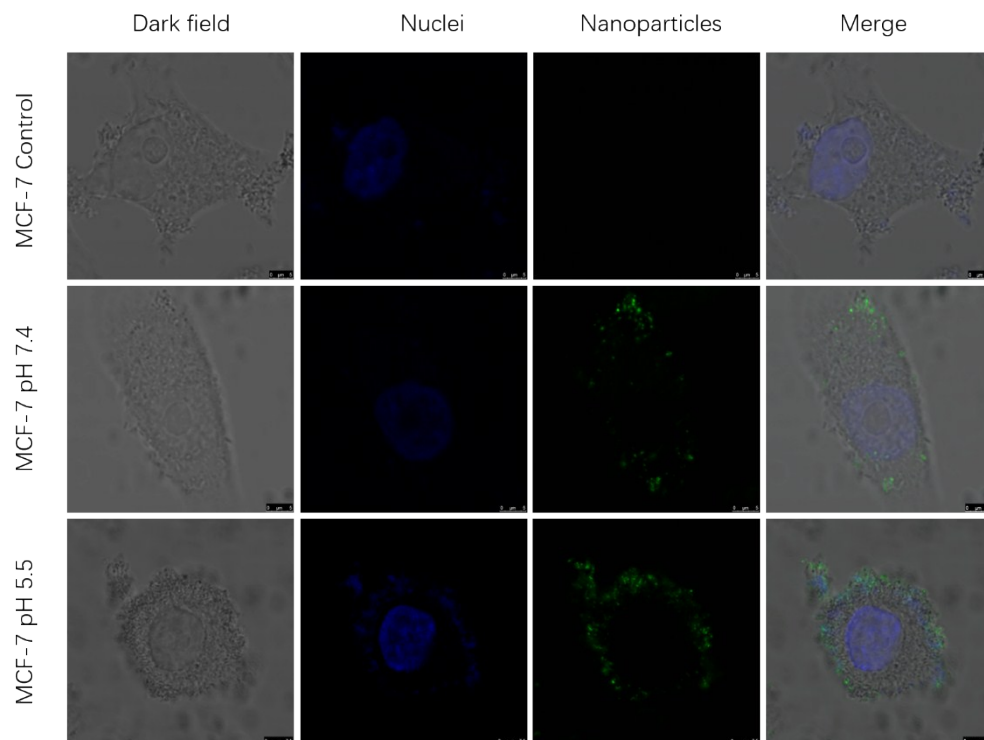

117

118 **Figure S7.** LSCM images of MCF-7 cells incubated with SPION-AN-FA@mPEG4 which was  
 119 pre-treated in pH 5.5 or 7.4 of PBS for 12 h at 37 °C.

121

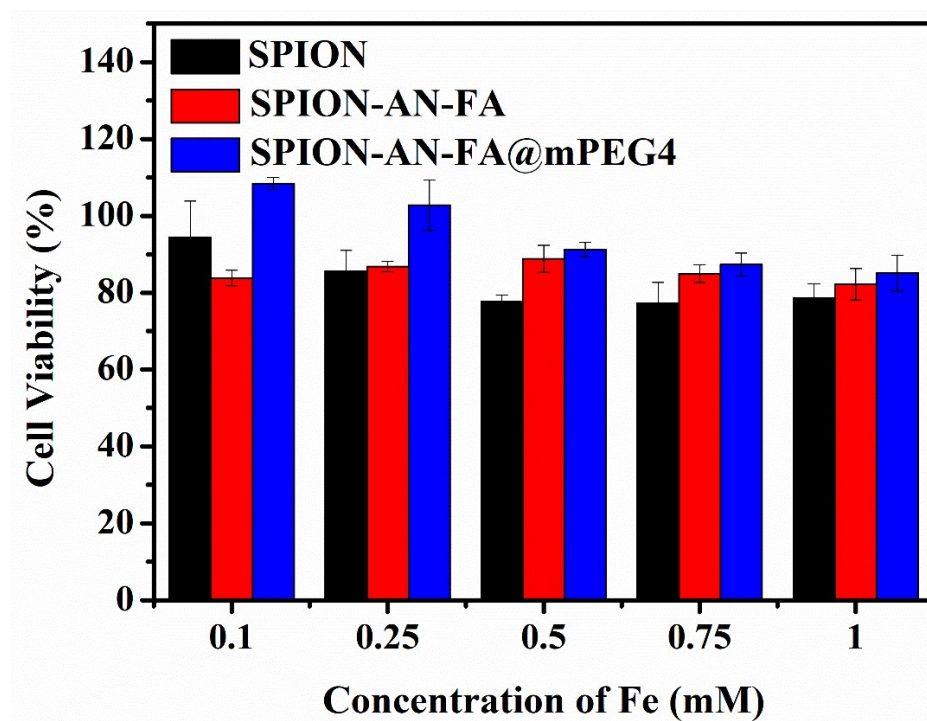

122

123 **Figure S8.** Cytotoxicity of SPION, SPION-AN-FA, or SPION-AN-FA@mPEG4 measured by  
124 MTT assay.

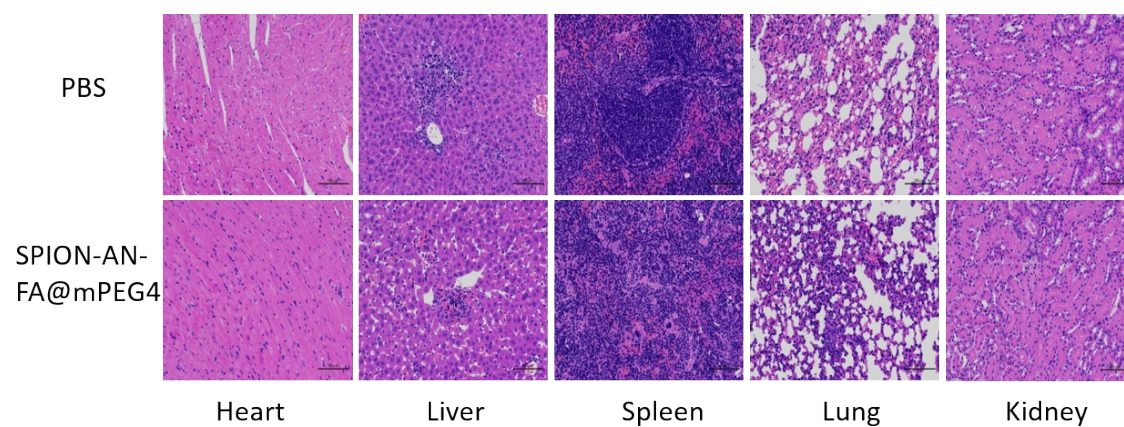

**Figure S9.** Histological analysis of main organs from the mice injected with 200  $\mu$ L of PBS for control or SPION-AN-FA@mPEG4.
